# Supplementary material for: Chemoselective reduction of nitrobenzenes to aminobenzenes having reducible groups by a titanium(iv) oxide photocatalyst under gas- and metal-free conditions
Source: Royal Society of Chemistry journal article supplement (doi:10.1039/c2cc31524f), 2012-01-01
Supplement: c2cc31524f.pdf [file c2cc31524f.pdf]

Supplementary information for

**Chemoselective reduction of nitrobenzenes to aminobenzenes having  
reducible groups by titanium(IV) oxide photocatalyst under gas- and  
metal- free conditions**

## Introduction

Table S1 Chemoselective reduction of NVB to AVB by various catalytic methods

| Catalyst                                                   | Temp.<br>/K | Solvent                      | Gas<br>phase   | Pressure<br>/atm | Time /h | Conversion<br>/% | Selectivity<br>/% | References |
|------------------------------------------------------------|-------------|------------------------------|----------------|------------------|---------|------------------|-------------------|------------|
| TiO <sub>2</sub>                                           | 298         | 10% Water-ACN                | Ar             | 1.0              | 2       | 100              | 93                | This work  |
| Pt/C-H <sub>3</sub> PO <sub>2</sub> -VO(acac) <sub>2</sub> | 373         | Toluene                      | H <sub>2</sub> | 4.9              | -       | 95 <sup>a</sup>  |                   | 1.9        |
| 0.23 mol%-Au/TiO <sub>2</sub>                              | 393         | Toluene                      | H <sub>2</sub> | 8.9              | 6       | 99               | 96                | 10-12      |
| 0.39 mol%-Au/Fe <sub>2</sub> O <sub>3</sub>                | 403         | Toluene                      | H <sub>2</sub> | 11.8             | 9.5     | 95               | 95                | 10         |
| 0.2 wt%-Pt/C                                               | 313         | Toluene                      | H <sub>2</sub> | 3.0              | -       | 95               | 90                | 11         |
| 0.2 wt% Pt/TiO <sub>2</sub>                                | 313         | Toluene                      | H <sub>2</sub> | 3.0              | 6.5     | 95               | 93                | 11,12      |
| 5 wt%-Ni/TiO <sub>2</sub>                                  | 393         | Toluene                      | H <sub>2</sub> | 15               | 3       | 93               | 90                | 11         |
| 1wt%-Ru/TiO <sub>2</sub>                                   | 393         | Toluene                      | H <sub>2</sub> | 15               | 1.5     | 95               | 96                | 11         |
| 0.2 mol%-Au/Al <sub>2</sub> O <sub>3</sub>                 | 393         | THF                          | H <sub>2</sub> | 30               | 2       | >99              | 99                | 13         |
| 2 mol%-Ag/Al <sub>2</sub> O <sub>3</sub>                   | 433         | THF                          | H <sub>2</sub> | 30               | 1       | >99              | 92                | 12,15      |
| 14 mol%-Ag/HT                                              | 423         | DMA <sup>b</sup>             | CO             | 9.0              | 3       | >99              | >99               | 16         |
| Rh <sub>6</sub> (CO) <sub>16</sub>                         | 353         | 2-Ethoxyethanol <sup>c</sup> | CO             | 4.0              | 5       | 91 <sup>a</sup>  |                   | 17         |
| MoO <sub>2</sub> Cl <sub>2</sub>                           | 393         | Ethanol                      | H <sub>2</sub> | 50               | 48      | >99              | >99               | 18         |
| Ag@CeO <sub>2</sub>                                        | 383         | Dodecane                     | H <sub>2</sub> | 6                | 6       | >99              | 98                | 19         |

<sup>a</sup> Yield of AVB. No data for conversion and selectivity were presented.

<sup>b</sup> *N,N*-Dimethylacetamide

<sup>c</sup> Water and *N,N,N',N'*-tetramethyl-1,3-propanediamine were added.

## Experimental

Bare TiO<sub>2</sub> powder (Degussa P 25, 50 mg) was suspended in a mixture of acetonitrile (ACN, Wako Pure Chemical Industries, Osaka) and water (5 cm<sup>3</sup>) containing *m*-nitrovinylbenzene (NVB, 50 μmol, Sigma-Aldrich Japan, Tokyo) and oxalic acid (OA, 200 μmol, Wako Pure Chemical Industries, Osaka) in a test tube. The tube was sealed with a rubber septum and then photoirradiated at a wavelength >300 nm by a high-pressure mercury arc (400 W, Eiko-sha, Osaka) under argon (Ar) with magnetic stirring at 298 K. After the reaction, gas phase was analyzed by a gas chromatograph (Shimadzu, GC-8A equipped with MS-5A columns). After the suspension had been filtered to remove the particles, the amounts of NVB and product(s) were determined by high-performance liquid chromatography (Jasco, UV-2075Plus detector, PU-2089Plus pump, equipped with an Inertsil ODS-3 column, eluent: aqueous sodium borate buffer/ACN = 50/50, flow rate: 0.5 cm<sup>3</sup> min<sup>-1</sup> at r.t). To obtain apparent quantum efficiency (AQE), a UV light-emitting diode (UV-LED, PJ-1505-2CA, CCS Inc, Kyoto, 927 μW cm<sup>-2</sup>, maximum energy at λ = 366 nm) was also used as a light source. A spectrum and light intensity of the UV-LED were determined using a spectroradiometer USR-45D (Ushio, Tokyo).

## Results

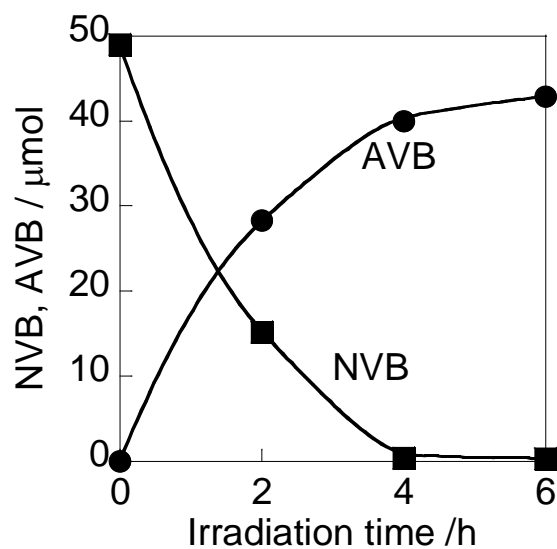

Figure S1 Time courses of amount of NVB remaining (squares) and amount of *m*-aminovinylbenzene (AVB) formed (circles) in an ACN suspension of TiO<sub>2</sub> (50 mg) in the presence of OA (200 μmol) as a hole scavenger under deaerated conditions.

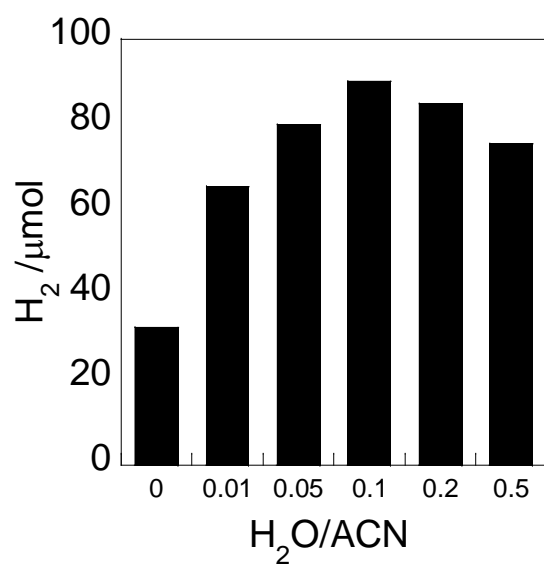

Figure S2 Effect of water content of solvents (water-ACN) on decomposition of OA (H<sub>2</sub> evolution) in the suspensions of platinized TiO<sub>2</sub> for 2 h.

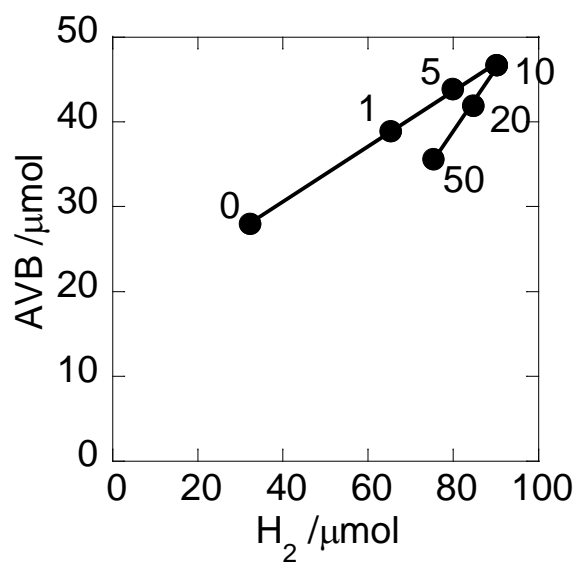

Figure S3 Correlations between amount of AVB formed and H<sub>2</sub> evolved after 2-h and 30-min photoirradiation. Values in the figure indicate the content of water in reaction mixtures.
